# Supplementary material
Source: Research Square preprint supplement (doi:10.21203/rs.3.rs-9358940/v1)
Supplement: Supplementary file 1 [file 9216b8afdce6413d6384d486.docx]

**Supplementary Materials**


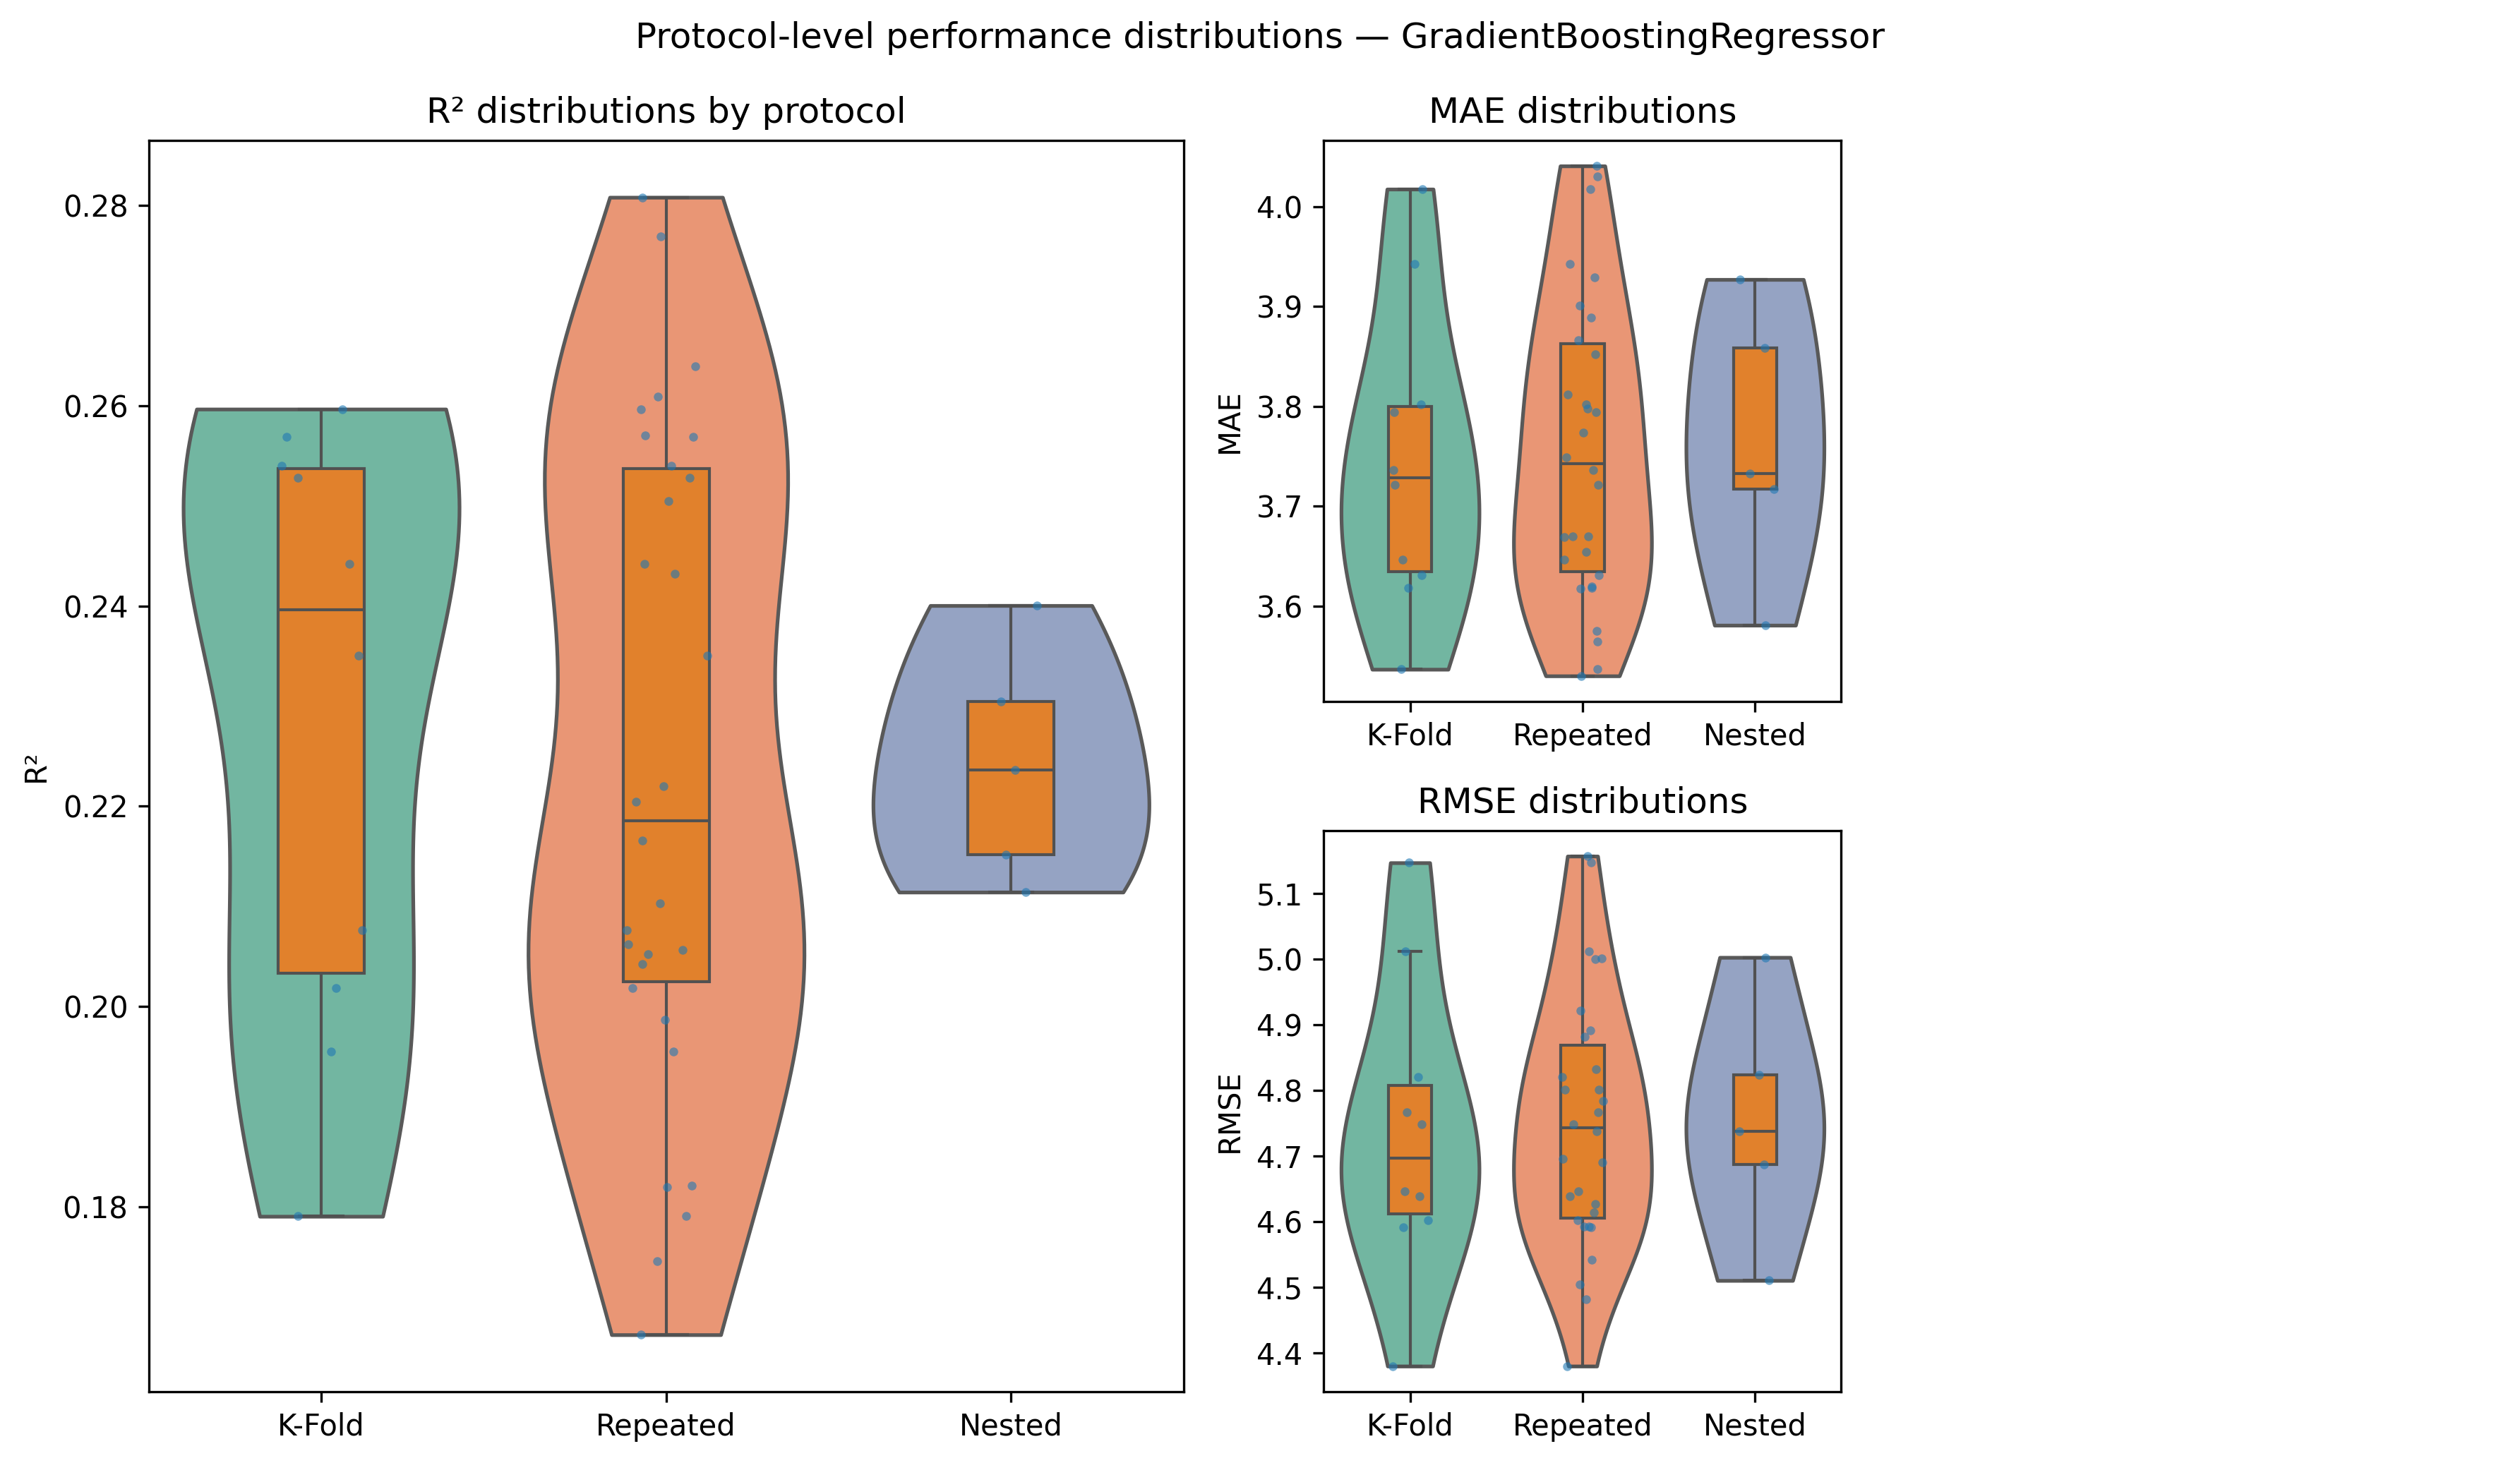


***Supplementary Figure S1***

***Protocol-level performance distributions.****Violin plots display R² (left), MAE (top right), and RMSE (bottom right) for 10-fold K-Fold, Repeated 10-fold CV, and Nested CV. Orange boxplots show medians and IQRs. K-Fold yielded the highest median R², whereas Nested CV exhibited the smallest dispersion; differences were not statistically significant after BH–FDR correction (Supplementary Tables S4–S5). We therefore report 10-fold K-Fold as the primary protocol and use Repeated/Nested CV for sensitivity analyses.*

**Supplementary Table S1a.** Distributional statistics of Happiness Score (mean, SD, quartiles, skewness, kurtosis, Shapiro–Wilk).

| Statistic | Value |
| --- | --- |
| Mean | 28.564 |
| SD | 5.402 |
| Median | 29.00 |
| Q1 | 25.00 |
| Q3 | 33.00 |
| Min | 9.00 |
| Max | 36.00 |
| Skewness | −0.761 |
| Kurtosis | 0.373 |
| Shapiro–Wilk W | 0.948 |
| p-value | <.001 |

**Supplementary Table S1b. Variable-level missingness in the analytic dataset.**
All 20 predictors and the outcome variable exhibited 0% missingness after pre-analysis exclusions (N = 4134 students).

| Scope | Variables (n) | Missing (n) | Missing (%) |
| --- | --- | --- | --- |
| Predictors | 20 | 0 | 0.0% |
| Outcome | 1 | 0 | 0.0% |
| Total | 21 | 0 | 0.0% |

**Supplementary Table S2.** Psychometric properties of the nine-item School Happiness scale (N = 4134).

| ITEM | MEAN | SD | FLOOR % | CEILING % | ITEM-TOTAL R | FACTOR LOADING (1F) |
| --- | --- | --- | --- | --- | --- | --- |
| M1 | 3.02 | 1.03 | 9 | 45 | 0.64 | 0.73 |
| M2 | 2.7 | 1.08 | 15 | 33 | 0.59 | 0.69 |
| M3 | 2.63 | 1.05 | 15 | 28 | 0.57 | 0.67 |
| M4 | 3.08 | 0.96 | 6 | 44 | 0.54 | 0.65 |
| M5 | 3.45 | 0.76 | 4 | 57 | 0.4 | 0.52 |
| M6 | 3.59 | 0.76 | 4 | 71 | 0.56 | 0.69 |
| M7 | 3.09 | 0.95 | 11 | 39 | 0.53 | 0.65 |
| M8 | 3.49 | 0.84 | 6 | 66 | 0.5 | 0.63 |
| M9 | 3.52 | 0.77 | 4 | 65 | 0.52 | 0.65 |
| CRONBACH’S Α |  |  |  |  |  | 0.8 |


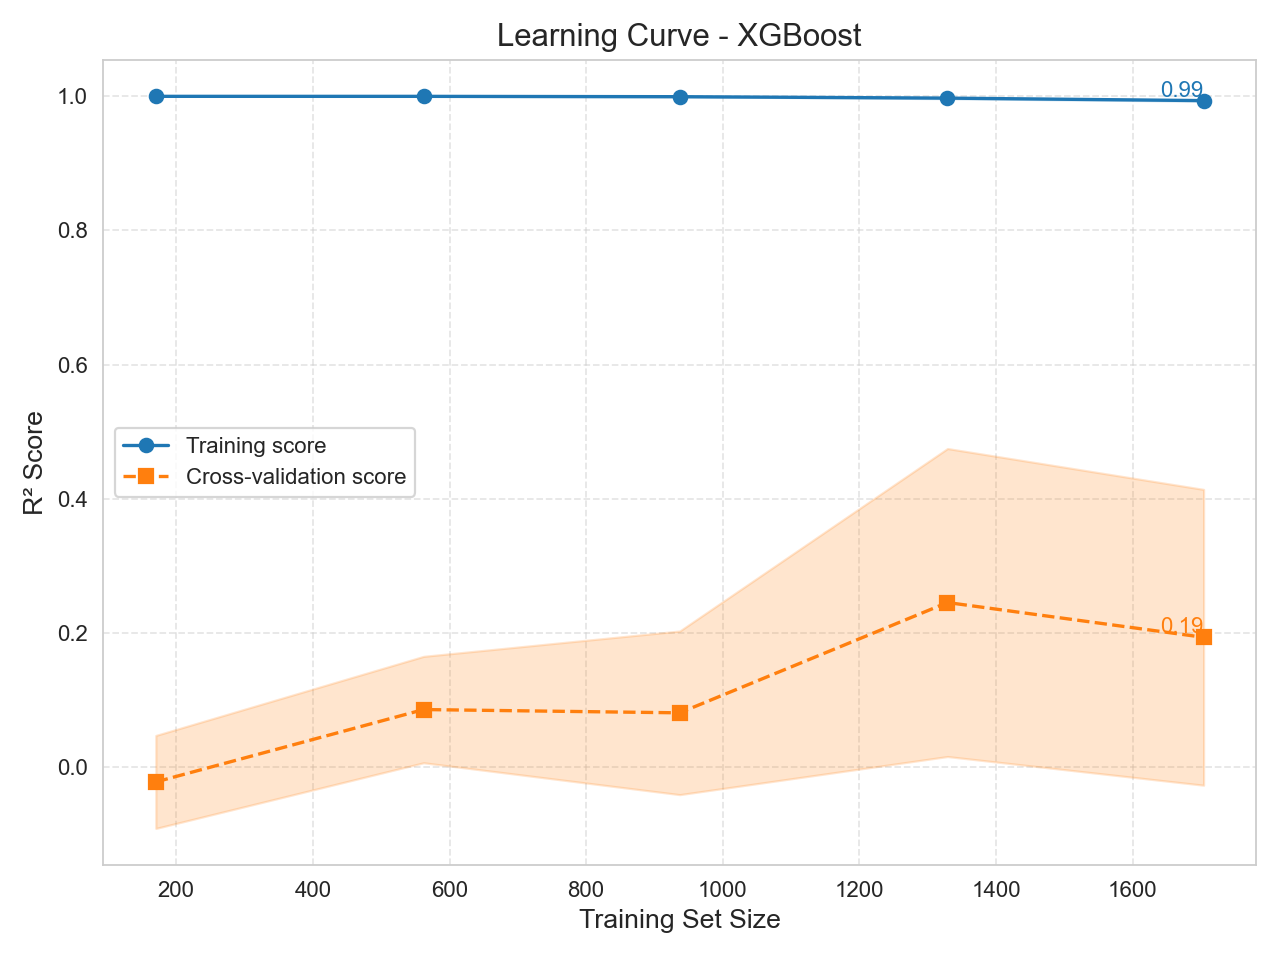


**Supplementary Figure S2a.** Learning curve of XGBRegressor showing near-saturation of training R². Panel shows training vs. validation performance (R²) across increasing boosting iterations. Curves plateau near R² ≈ 0.99 on training folds, indicating near-saturation and potential overfitting risk.


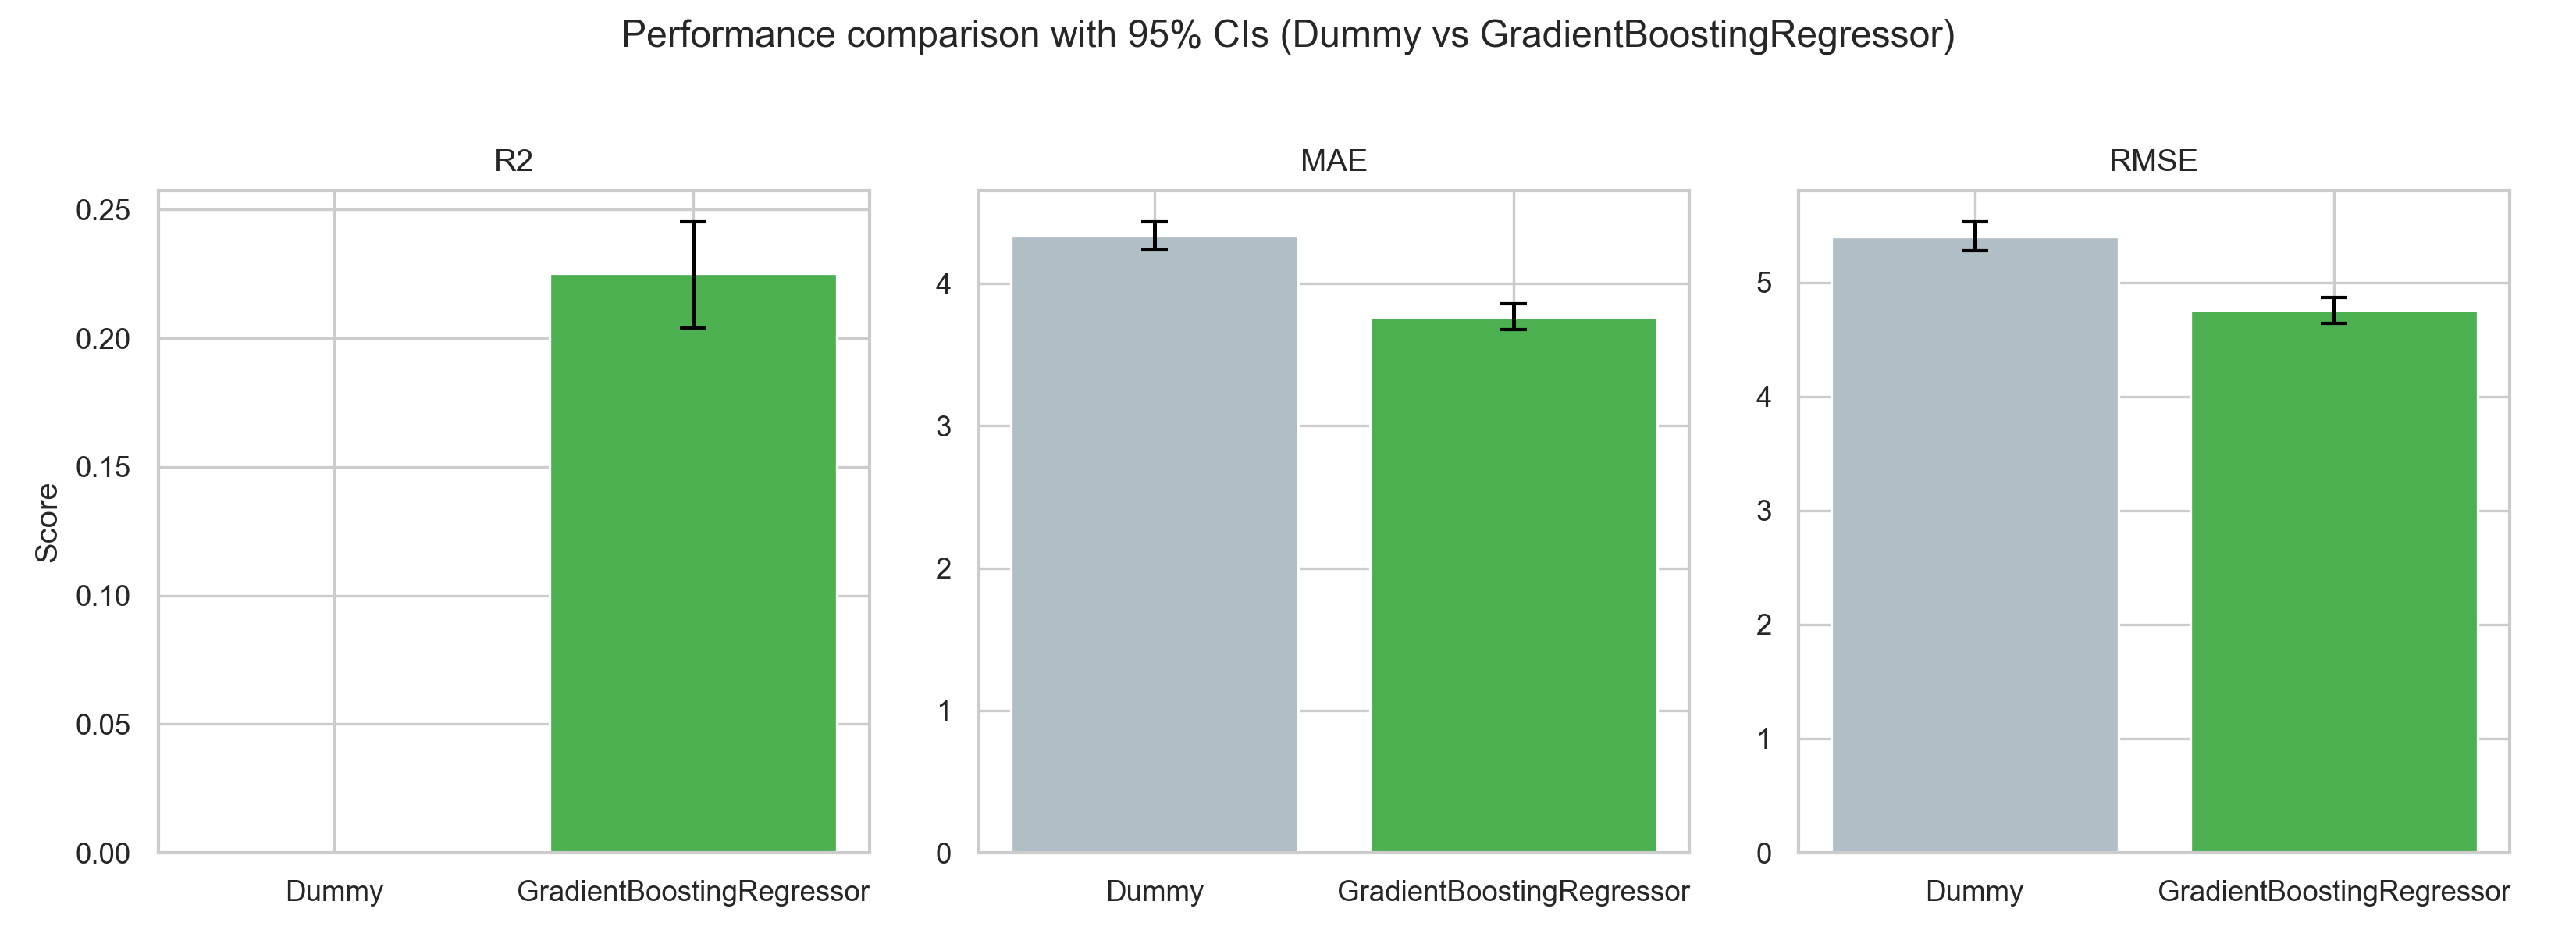


***Supplementary Figure S2b.*** *Baseline (DummyRegressor) vs. Gradient Boosting Regressor performance with 95% bootstrap CIs. Bar chart comparing DummyRegressor (mean predictor) against Gradient Boosting Regressor (best performer). R², MAE, and RMSE are displayed with bias-corrected and accelerated (BCa) bootstrap confidence intervals.*


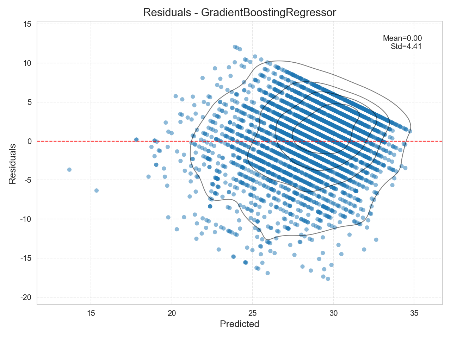

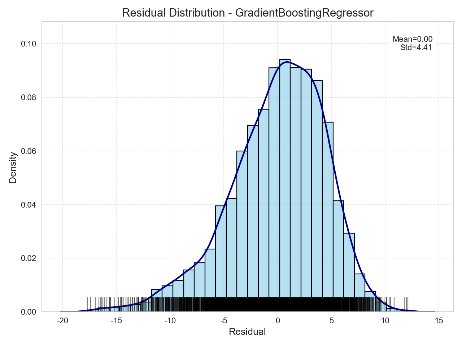

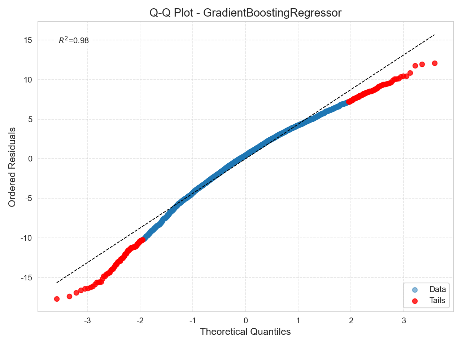


***Supplementary Figure S3.*** *Residual diagnostics for Gradient Boosting Regressor (residual–fitted, histogram, Q–Q plot). These diagnostics confirm mild heteroskedasticity and approximate normality of residuals at the center, with heavier tails.*

**Supplementary Table S3. Baseline vs. Best model performance metrics**This table reports mean cross-validated R², MAE, and RMSE for the DummyRegressor (mean predictor baseline) and the best-performing model (Gradient Boosting Regressor). Values represent out-of-fold predictions under the primary 10-fold CV regime.

| MODEL | R2 | R2_CI_LOW | R2_CI_HIGH | MAE | MAE_CI_LOW | MAE_CI_HIGH | RMSE | RMSE_CI_LOW | RMSE_CI_HIGH |
| --- | --- | --- | --- | --- | --- | --- | --- | --- | --- |
| DummyRegressor(mean) | -0.0006732780512410663 | -0.0019974948259009195 | -0.0002577734738493543 | 4.334461728510901 | 4.234350740246228 | 4.433033356399589 | 5.403594630832395 | 5.27770030347875 | 5.530174053974853 |
| GradientBoostingRegressor | 0.233983164352145321 | 0.203990470113694263 | 0.245113253795991942 | 3.700492126498491 | 3.675086110148004 | 3.854849044449318 | 4.719097228152426 | 4.639657392736935 | 4.866270970982543 |

**Supplementary Table S4a. Compact FDR summary of protocol comparisons.**
Minimum and maximum Benjamini–Hochberg adjusted p-values across metrics (R², MAE, RMSE).
No differences were significant at α = 0.05.

| METRIC | MIN ADJ. P | MAX ADJ. P | SIGNIFICANT (α=0.05) |
| --- | --- | --- | --- |
| MAE | 0.625 | 1.0 | Not Significant |
| R² | 0.332 | 1.0 | Not Significant |
| RMSE | 0.326 | 1.0 | Not Significant |

**Supplementary Table S4b. Full FDR-adjusted pairwise tests.**
Pairwise comparisons between resampling protocols (10-fold K-Fold, Repeated K-Fold, Nested CV). Values include raw p-values, adjusted p-values, and H₀ rejection status.

| METRIC | COMPARISON | RAW P-VALUE | FDR ADJ. P | REJECT H0 |
| --- | --- | --- | --- | --- |
| R² | KFold vs. Repeated | 1.0 | 1.0 | False |
| R² | KFold vs. Nested | 0.1755809852410919 | 0.3315473496881443 | False |
| R² | Repeated vs. Nested | 0.2210315664587629 | 0.3315473496881443 | False |
| RMSE | KFold vs. Repeated | 1.0 | 1.0 | False |
| RMSE | KFold vs. Nested | 0.1719919217016319 | 0.32567179671084 | False |
| RMSE | Repeated vs. Nested | 0.21711453114056 | 0.32567179671084 | False |
| MAE | KFold vs. Repeated | 1.0 | 1.0 | False |
| MAE | KFold vs. Nested | 0.3663492979615572 | 0.6254318862892301 | False |
| MAE | Repeated vs. Nested | 0.4169545908594867 | 0.6254318862892301 | False |


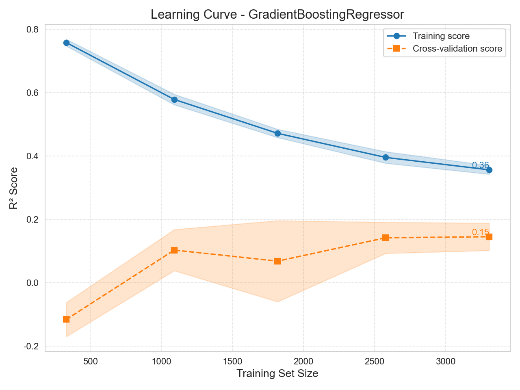

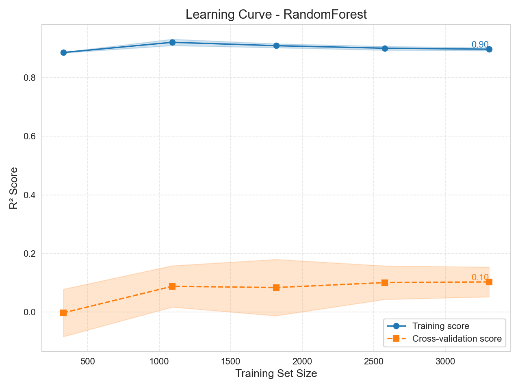


**Supplementary Figure S4. Learning curves for RandomForest and Gradient Boosting Regressor.**
Cross-validated increased rapidly up to ~40 % of training data and stabilized near 0.23 for both models at full data, matching Table 1 results.
Early points (10–30 %) yielded lower ≈ 0.10–0.15, indicating initial underfitting before convergence.

**Supplementary S5. Pairwise protocol tests and explainability stability**

**Supplementary Table S5. Corrected pairwise t-tests across CV protocols**

Corrected repeated t-tests (Nadeau & Bengio, 2003) comparing K-Fold, Repeated K-Fold, and Nested CV protocols for R², MAE, and RMSE. Raw and FDR-adjusted p-values are reported alongside the decision to reject the null hypothesis (H₀). No contrasts reached significance (all FDR-adjusted p ≥ 0.33).

| METRIC | COMPARISON | T_STAT | RAW_P | FDR_P | REJECT_H0 |
| --- | --- | --- | --- | --- | --- |
| R2 | KFold vs. Repeated | 0.0 | 1.0 | 1.0 | False |
| R2 | KFold vs. Nested | 0.12679128308110496 | 0.9107031901786196 | 1.0 | False |
| R2 | Repeated vs. Nested | 0.10812796952215425 | 0.9237644846961541 | 1.0 | False |
| RMSE | KFold vs. Repeated | 0.0 | 1.0 | 1.0 | False |
| RMSE | KFold vs. Nested | -0.9351288628028848 | 0.44843985836163736 | 0.7632151175392976 | False |
| RMSE | Repeated vs. Nested | -0.7974805737375293 | 0.5088100783595317 | 0.7632151175392976 | False |
| MAE | KFold vs. Repeated | 0.0 | 1.0 | 1.0 | False |
| MAE | KFold vs. Nested | -1.2676620821043052 | 0.332528992541145 | 0.5890330602256082 | False |
| MAE | Repeated vs. Nested | -1.08106585600593 | 0.39268870681707213 | 0.5890330602256082 | False |


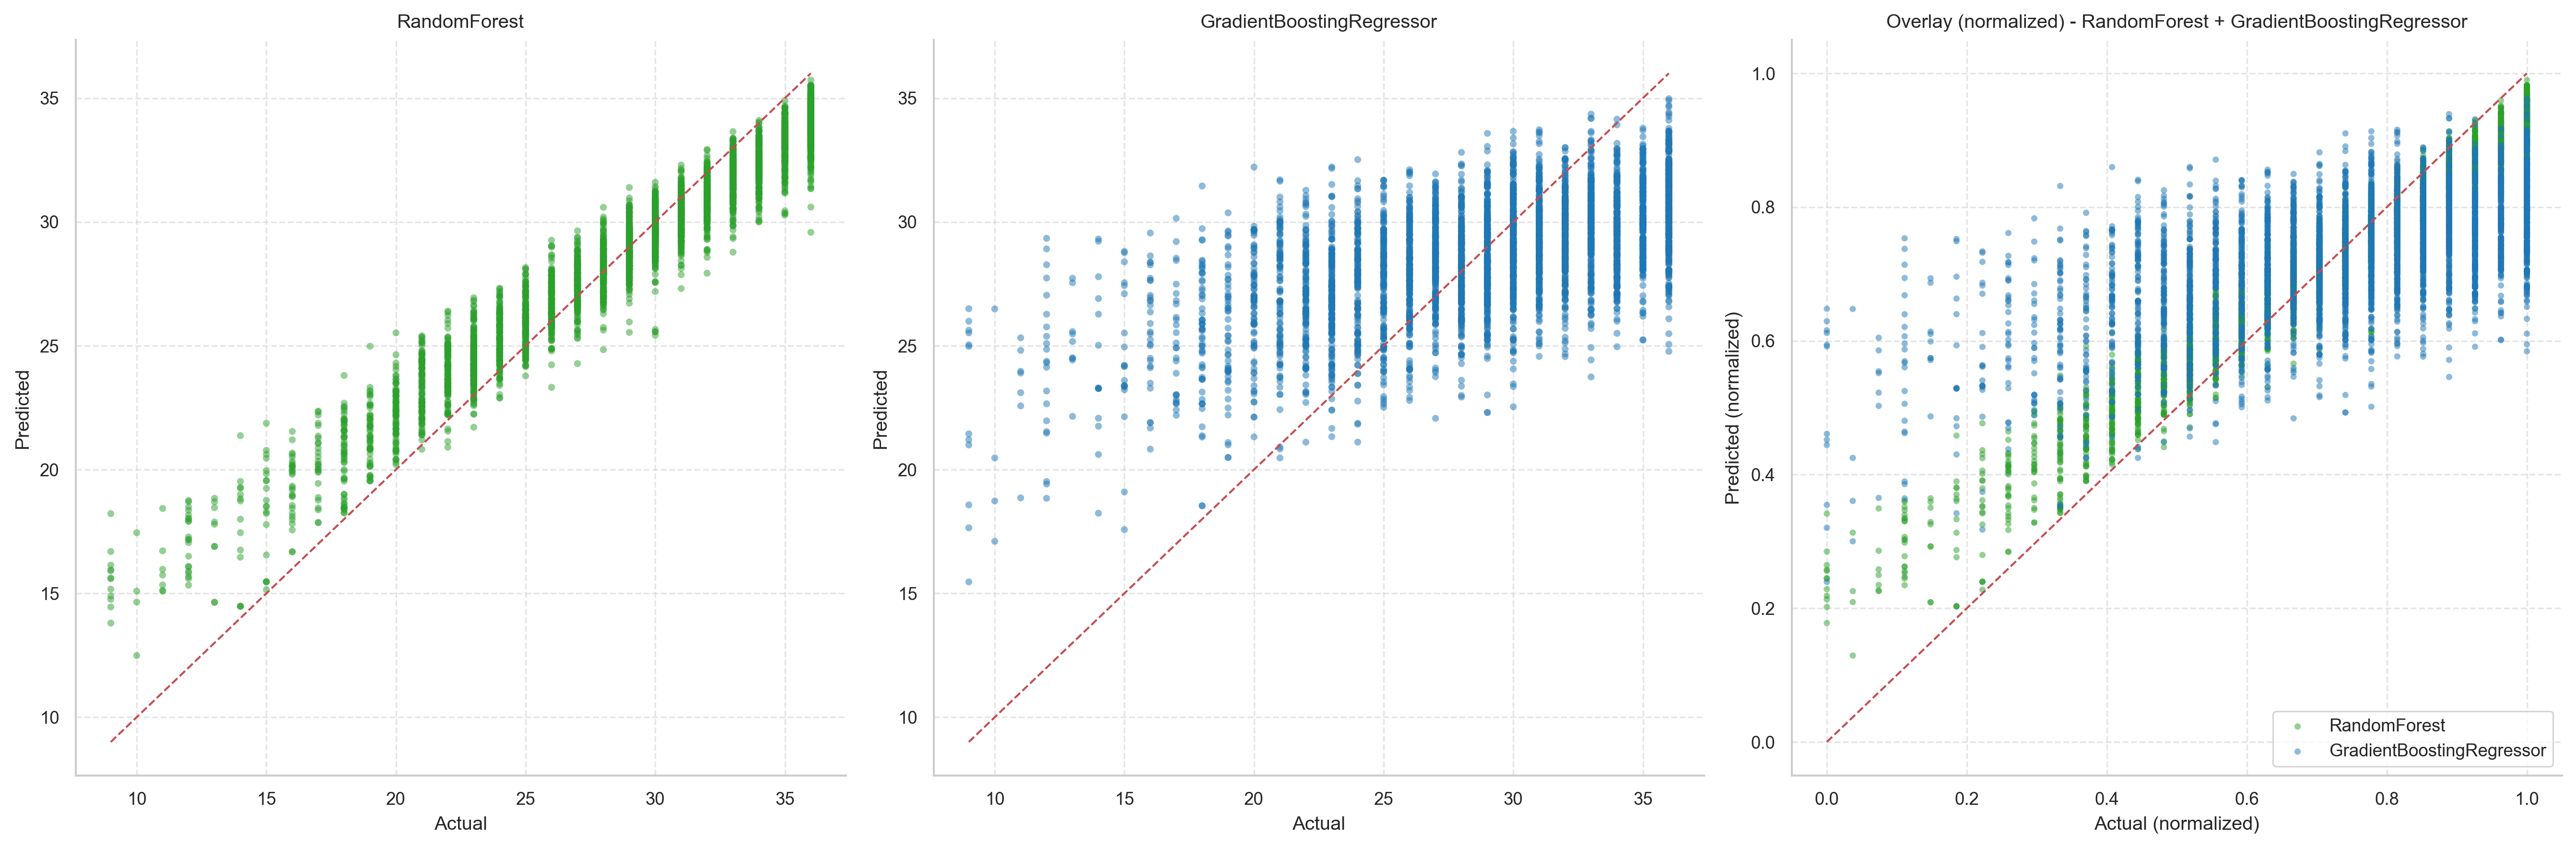


**Supplementary Figure S5. Predicted vs. observed happiness scores for the two best-performing models.**

*Left: Random Forest; middle: Gradient Boosting Regressor; right: normalized overlay of both models. Each model is fit on the full dataset and predictions are plotted against the corresponding observed scores (dashed red line: 45° identity; solid black line: least‑squares fit). Both models show moderate concordance, with greater dispersion at higher scores consistent with heteroskedasticity. In the normalized overlay, Gradient Boosting tracks the identity more closely across the range, aligning with its superior out‑of‑sample performance reported in Table S3a.*

Supplementary S6. Model assumptions and calibration slopes

**Supplementary Table S6a. Breusch–Pagan heteroskedasticity test results**

The Breusch–Pagan test rejected the null hypothesis of homoskedasticity for Gradient Boosting Regressor residuals, indicating heteroskedastic variance. Both LM and F statistics were highly significant (p < .001).

| Test | Statistic | df1 | df2 | p-value | Note |
| --- | --- | --- | --- | --- | --- |
| LM | 99.835 | — | — | 2.16 × 10⁻⁸ | Breusch–Pagan |
| F | 4.139 | — | — | 3.44 × 10⁻¹¹ | Breusch–Pagan |

**Supplementary Table S6b. Calibration intercepts and slopes**

Calibration slopes and intercepts quantify proportionality and bias between predicted and observed outcomes

| MODEL | INTERCEPT | SLOPE | R² (PRED VS OBS) | R² (TRAIN) | R² (CV) | ΔR² (TRAIN – CV) |
| --- | --- | --- | --- | --- | --- | --- |
| GradientBoostingRegressor | -3.63 | 1.13 | 0.23 | 0.337 | 0.229 | 0.109 |
| RandomForest | 0.66 | 0.98 | 0.232 | 0.896 | 0.231 | 0.662 |

**Supplementary Table S7a. Gradient Boosting Regressor – binned calibration metrics**

Observed and predicted outcome means by decile of predicted values. Errors (MAE, RMSE) quantify calibration fit within each bin.

| BIN | N | Y_MEAN | YHAT_MEAN | MAE | RMSE | BIN_LEFT | BIN_RIGHT | BIN_RANGE |
| --- | --- | --- | --- | --- | --- | --- | --- | --- |
| 0 | 414 | 23.14 | 24.12 | 4.32 | 5.53 | 14.95 | 25.57 | 14.95-25.57 |
| 1 | 413 | 25.81 | 26.2 | 4.21 | 5.27 | 25.57 | 26.75 | 25.57-26.75 |
| 2 | 413 | 27.23 | 27.17 | 4.31 | 5.43 | 26.75 | 27.58 | 26.75-27.58 |
| 3 | 414 | 28.08 | 27.88 | 4.03 | 5.04 | 27.58 | 28.2 | 27.58-28.20 |
| 4 | 413 | 28.25 | 28.46 | 3.69 | 4.66 | 28.2 | 28.74 | 28.20-28.74 |
| 5 | 413 | 29.42 | 29.02 | 3.74 | 4.69 | 28.74 | 29.3 | 28.74-29.30 |
| 6 | 414 | 29.73 | 29.58 | 3.66 | 4.57 | 29.3 | 29.87 | 29.30-29.87 |
| 7 | 413 | 30.38 | 30.16 | 3.37 | 4.25 | 29.87 | 30.49 | 29.87-30.49 |
| 8 | 413 | 31.27 | 30.93 | 3.19 | 3.94 | 30.49 | 31.38 | 30.49-31.38 |
| 9 | 414 | 32.33 | 32.25 | 2.92 | 3.65 | 31.38 | 35.04 | 31.38-35.04 |

**Supplementary Table S7b. Random Forest – binned calibration metrics**

| BIN | N | Y_MEAN | YHAT_MEAN | MAE | RMSE | BIN_LEFT | BIN_RIGHT | BIN_RANGE |
| --- | --- | --- | --- | --- | --- | --- | --- | --- |
| 0 | 414 | 22.8 | 23.34 | 4.07 | 5.35 | 15.58 | 25.1 | 15.58-25.10 |
| 1 | 413 | 26.05 | 25.88 | 4.02 | 5.16 | 25.1 | 26.55 | 25.10-26.55 |
| 2 | 421 | 27.73 | 27.02 | 4.03 | 4.99 | 26.55 | 27.43 | 26.55-27.43 |
| 3 | 410 | 28.31 | 27.8 | 3.96 | 5.02 | 27.43 | 28.14 | 27.43-28.14 |
| 4 | 411 | 28.18 | 28.51 | 3.85 | 4.98 | 28.14 | 28.85 | 28.14-28.85 |
| 5 | 414 | 28.99 | 29.19 | 3.78 | 4.87 | 28.85 | 29.5 | 28.85-29.50 |
| 6 | 413 | 29.98 | 29.82 | 3.47 | 4.41 | 29.5 | 30.15 | 29.50-30.15 |
| 7 | 418 | 30.26 | 30.48 | 3.33 | 4.21 | 30.15 | 30.79 | 30.15-30.79 |
| 8 | 406 | 30.99 | 31.26 | 3.35 | 4.41 | 30.79 | 31.8 | 30.79-31.80 |
| 9 | 414 | 32.4 | 32.66 | 2.93 | 3.7 | 31.8 | 35.2 | 31.80-35.20 |

**Supplementary Table S8. Combined feature importance (raw and normalized values)**

Raw importances from Random Forest (RF) and Gradient Boosting Regressor, normalized within each learner (0–100), and their averaged combined index. The combined index provides a model-agnostic ranking of predictors.

| feature | rf_importance | gbr_importance | rf_norm100 | gbr_norm100 | combined_mean |
| --- | --- | --- | --- | --- | --- |
| bullying_score | 0.59 | 0.17 | 100 | 100 | 100 |
| monthly_books_read | 0.29 | 0.06 | 49.54 | 34.17 | 41.86 |
| region | 0.27 | 0.07 | 44.62 | 38.92 | 41.77 |
| daily_mobile_usage | 0.25 | 0.04 | 42.81 | 26.28 | 34.54 |
| gender | 0.25 | 0.05 | 42.09 | 26.63 | 34.36 |
| teacher_intervention | 0.14 | 0.04 | 23.95 | 21.68 | 22.81 |
| daily_tv_time | 0.11 | 0.01 | 19.31 | 8.75 | 14.03 |
| mother_education_level | 0.11 | 0.02 | 18.44 | 9.54 | 13.99 |
| father_education_level | 0.10 | 0.01 | 16.57 | 8.40 | 12.49 |
| age | 0.09 | 0.01 | 14.67 | 5.58 | 10.13 |
| reporting_to_family | 0.04 | 0.02 | 7.01 | 13.02 | 10.01 |
| household_size | 0.07 | 0.01 | 11.21 | 6.58 | 8.90 |
| number_of_siblings | 0.06 | 0.01 | 10.55 | 6.06 | 8.31 |
| grade_level | 0.07 | 0.01 | 11.92 | 4.28 | 8.10 |
| sibling_order | 0.07 | 0.01 | 12.15 | 3.51 | 7.83 |
| mother_occupation | 0.05 | 0.00 | 7.67 | 2.57 | 5.12 |
| household_income | 0.04 | 0.00 | 7.43 | 1.68 | 4.56 |
| parental_marital_status | 0.01 | 0.00 | 2.39 | 2.68 | 2.54 |
| father_occupation | 0.01 | 0.00 | 2.28 | 1.41 | 1.85 |
| nationality | 0.00 | 0.00 | 0.14 | 0.00 | 0.07 |

**Supplementary Table S9. Top-10 inclusion frequencies.**
This table reports the frequency with which each feature entered the top-10 ranked predictors across 1,000 bootstrap replications. High inclusion frequency indicates stability of feature relevance across resampled datasets, providing a complementary measure of robustness to the importance indices shown in Supplementary S8.

| bullying_score | 1,000 | 1 |
| --- | --- | --- |
| region | 1,000 | 1 |
| monthly_books_read | 1,000 | 1 |
| gender | 1,000 | 1 |
| daily_mobile_usage | 999 | 1.00 |
| teacher_intervention | 957 | 0.96 |
| daily_tv_time | 661 | 0.66 |
| mother_education_level | 604 | 0.60 |
| father_education_level | 569 | 0.57 |
| age | 408 | 0.41 |
| reporting_to_family | 351 | 0.35 |
| household_size | 297 | 0.30 |
| grade_level | 288 | 0.29 |
| number_of_siblings | 276 | 0.28 |
| sibling_order | 211 | 0.21 |
| mother_occupation | 123 | 0.12 |
| household_income | 108 | 0.11 |
| father_occupation | 59 | 0.06 |
| parental_marital_status | 54 | 0.05 |
| nationality | 35 | 0.04 |

**Supplementary Table S10. Computational environment and model hyperparameters.** Panel A details the software and hardware environment. Panel B lists the exact hyperparameters for the top-performing models (Gradient Boosting Regressor and Random Forest) to ensure reproducibility. Parameters not listed retained their default values in scikit-learn v1.7.2.

**Panel A: Software Environment**

| Component | Version | Notes |
| --- | --- | --- |
| Python | 3.11.9 | Windows-11 |
| NumPy | 2.2.6 | Numerical computing |
| Pandas | 2.3.2 | Data manipulation |
| Scikit-learn | 1.7.2 | Machine learning estimators |
| XGBoost | 3.0.5 | Gradient boosting reference |

**Panel B: Model Hyperparameters**

| Model | Parameter | Value | Description |
| --- | --- | --- | --- |
| Gradient Boosting | n_estimators | 100 | Number of boosting stages to perform |
| Regressor (GBR) | learning_rate | 0.1 | Contribution of each tree (shrinkage) |
|  | max_depth | 3 | Maximum depth of individual regression estimators |
|  | subsample | 1.0 | Fraction of samples used for fitting learner |
|  | min_samples_split | 2 | Minimum samples required to split an internal node |
|  | loss | 'squared_error' | Loss function optimized (Least Squares) |
|  | random_state | 42 | Random seed for reproducibility |
| Random Forest | n_estimators | 500 | Number of trees in the forest |
| Regressor (RF) | max_depth | None | Nodes are expanded until all leaves are pure |
|  | max_features | 1.0 | Percentage of features to consider (100%) |
|  | min_samples_leaf | 1 | Minimum number of samples at a leaf node |
|  | random_state | 42 | Random seed for bootstrapping and sampling |
| Global Settings | RSTATE | 42 | Global random seed for all stochastic processes |
|  | CV_FOLDS | **10** | Cross-validation strategy (K-Fold) used in Table 1 |

**Supplementary Table S11. Gradient Boosting Regressor SHAP summary statistics for the top predictors of School Happiness.**
This table reports mean absolute SHAP values (|SHAP|) for the predictors, averaged across 10-fold cross-validation folds. Larger |SHAP| values indicate stronger contributions to the model’s predictions.

| feature | pretty | mean_abs_shap |
| --- | --- | --- |
| bullying_score | Bullying: Score | 1.036828 |
| gender | Gender | 0.703017 |
| monthly_books_read | Monthly: Books Read | 0.646042 |
| daily_mobile_usage | Daily: Mobile Usage | 0.620987 |
| region | Region | 0.50344 |
| teacher_intervention | Teacher: Intervention | 0.476115 |
| mother_education_level | Mother: Education Level | 0.255657 |
| reporting_to_family | Reporting: To Family | 0.238621 |
| father_education_level | Father: Education Level | 0.202985 |
| daily_tv_time | Daily: TV Time | 0.194864 |
| age | Age | 0.137716 |
| mother_occupation | Mother: Occupation | 0.11848 |
| grade_level | Grade: Level | 0.113417 |
| parental_marital_status | Parental: Marital Status | 0.072395 |
| number_of_siblings | Number: Of Siblings | 0.06651 |
| sibling_order | Sibling: Order | 0.058131 |
| household_size | Household: Size | 0.057927 |
| household_income | Household: Income | 0.040454 |
| father_occupation | Father: Occupation | 0.019859 |
| nationality | Nationality | 0 |

**Supplementary Table S12.** Little’s MCAR test results for the raw versus analytic dataset schema.
The raw schema showed minimal missingness but formally deviated from MCAR assumptions. After the pre-specified exclusions, the analytic modeling matrix contained no missing values, rendering MCAR testing inapplicable by definition.

| DATASET_SCOPE | CHI2 | DF | P_VALUE | ROWS | TOTAL_CELLS | TOTAL_MISSING_PCT |
| --- | --- | --- | --- | --- | --- | --- |
| RAW_SCHEMA | N/A | N/A | N/A | 4134 | 206700 | 0.00% |
| ANALYTIC_CLEANED | N/A | N/A | N/A | 4134 | 103350 | 0.00% |

**Supplementary Table S13. Ordinary Least Squares regression summary (N =** **4134).**
Dependent variable: School Happiness Score.

| PREDICTOR | COEF. | STD. ERR. | T | P>|T| | 95% CI (LOWER) | 95% CI (UPPER) |
| --- | --- | --- | --- | --- | --- | --- |
| bullying_score | -0.15402008184641355 | 0.009440847353205767 | -16.31422223918428 | 5.023952846230898e-58 | -0.17252925342943798 | -0.13551091026338913 |
| monthly_books_read | 0.6526652091906837 | 0.06138265589570381 | 10.632730038590005 | 4.5646998334374986e-26 | 0.5323219743422212 | 0.7730084440391463 |
| gender | -1.46556877378905 | 0.15205769705714492 | -9.638241287044307 | 9.348931753868348e-22 | -1.7636841759403785 | -1.1674533716377213 |
| teacher_intervention | 0.5896082620859129 | 0.07139437845890739 | 8.25846901132804 | 1.96804341146316e-16 | 0.44963663120146863 | 0.7295798929703572 |
| daily_mobile_usage | -0.5835309847345225 | 0.07255269370314364 | -8.0428576108021 | 1.137876360005618e-15 | -0.7257735405477044 | -0.44128842892134057 |
| reporting_to_family | -1.0596922570037621 | 0.2233140862829642 | -4.745299656829584 | 2.1527296386658914e-06 | -1.4975087564426783 | -0.6218757575648459 |
| region | 0.14557973529425797 | 0.04065303602908094 | 3.581029844612792 | 0.0003462021509846419 | 0.06587777729388554 | 0.22528169329463038 |
| father_education_level | -0.2669099692203443 | 0.08287842682074305 | -3.2204999474427924 | 0.0012896399185625426 | -0.42939655174467384 | -0.10442338669601478 |
| daily_tv_time | -0.20279962648759353 | 0.07672858812316737 | -2.6430777816744473 | 0.008246795092805034 | -0.3532291959703236 | -0.05237005700486347 |
| mother_occupation | 0.4342337396168004 | 0.1743949192072595 | 2.4899448997177243 | 0.01281551181086677 | 0.09232528987168614 | 0.7761421893619147 |
| age | -0.24462567789505518 | 0.10126065082071428 | -2.415801951818125 | 0.01574393211890002 | -0.4431513706140352 | -0.04609998517607514 |
| parental_marital_status | -0.5532359064102714 | 0.309537986940114 | -1.7872956785666034 | 0.07396337592288883 | -1.1600979281538055 | 0.05362611533326267 |
| household_income | 0.23470788958556293 | 0.1422684289602649 | 1.649753858258434 | 0.09906970502521056 | -0.04421524770875018 | 0.513631026879876 |
| mother_education_level | -0.12626362978720904 | 0.08019423104310983 | -1.5744727288342448 | 0.11545516887175453 | -0.28348773550708384 | 0.030960475932665793 |
| sibling_order | -0.1122534099290827 | 0.08608383140507206 | -1.304001089366809 | 0.19230623708939218 | -0.281024320673613 | 0.0565175008154476 |
| household_size | -0.07892653351598125 | 0.08095436778805906 | -0.9749508973081386 | 0.3296419949592123 | -0.2376409187534091 | 0.07978785172144659 |
| number_of_siblings | -0.05601510776024941 | 0.10162064563955923 | -0.5512177905160214 | 0.5815143492711388 | -0.2552465852061415 | 0.14321636968564272 |
| grade_level | -0.05320841351290351 | 0.11807480853071464 | -0.4506330704661907 | 0.6522777982950302 | -0.28469895763081565 | 0.17828213060500867 |
| nationality | -0.057526739786852805 | 1.1113292980825473 | -0.05176390102025352 | 0.9587193353281867 | -2.2363337783803985 | 2.1212802988066928 |
| father_occupation | 0.003148211187605939 | 0.2951164021457687 | 0.010667693034733203 | 0.991489091611603 | -0.5754396972829249 | 0.5817361196581367 |

*
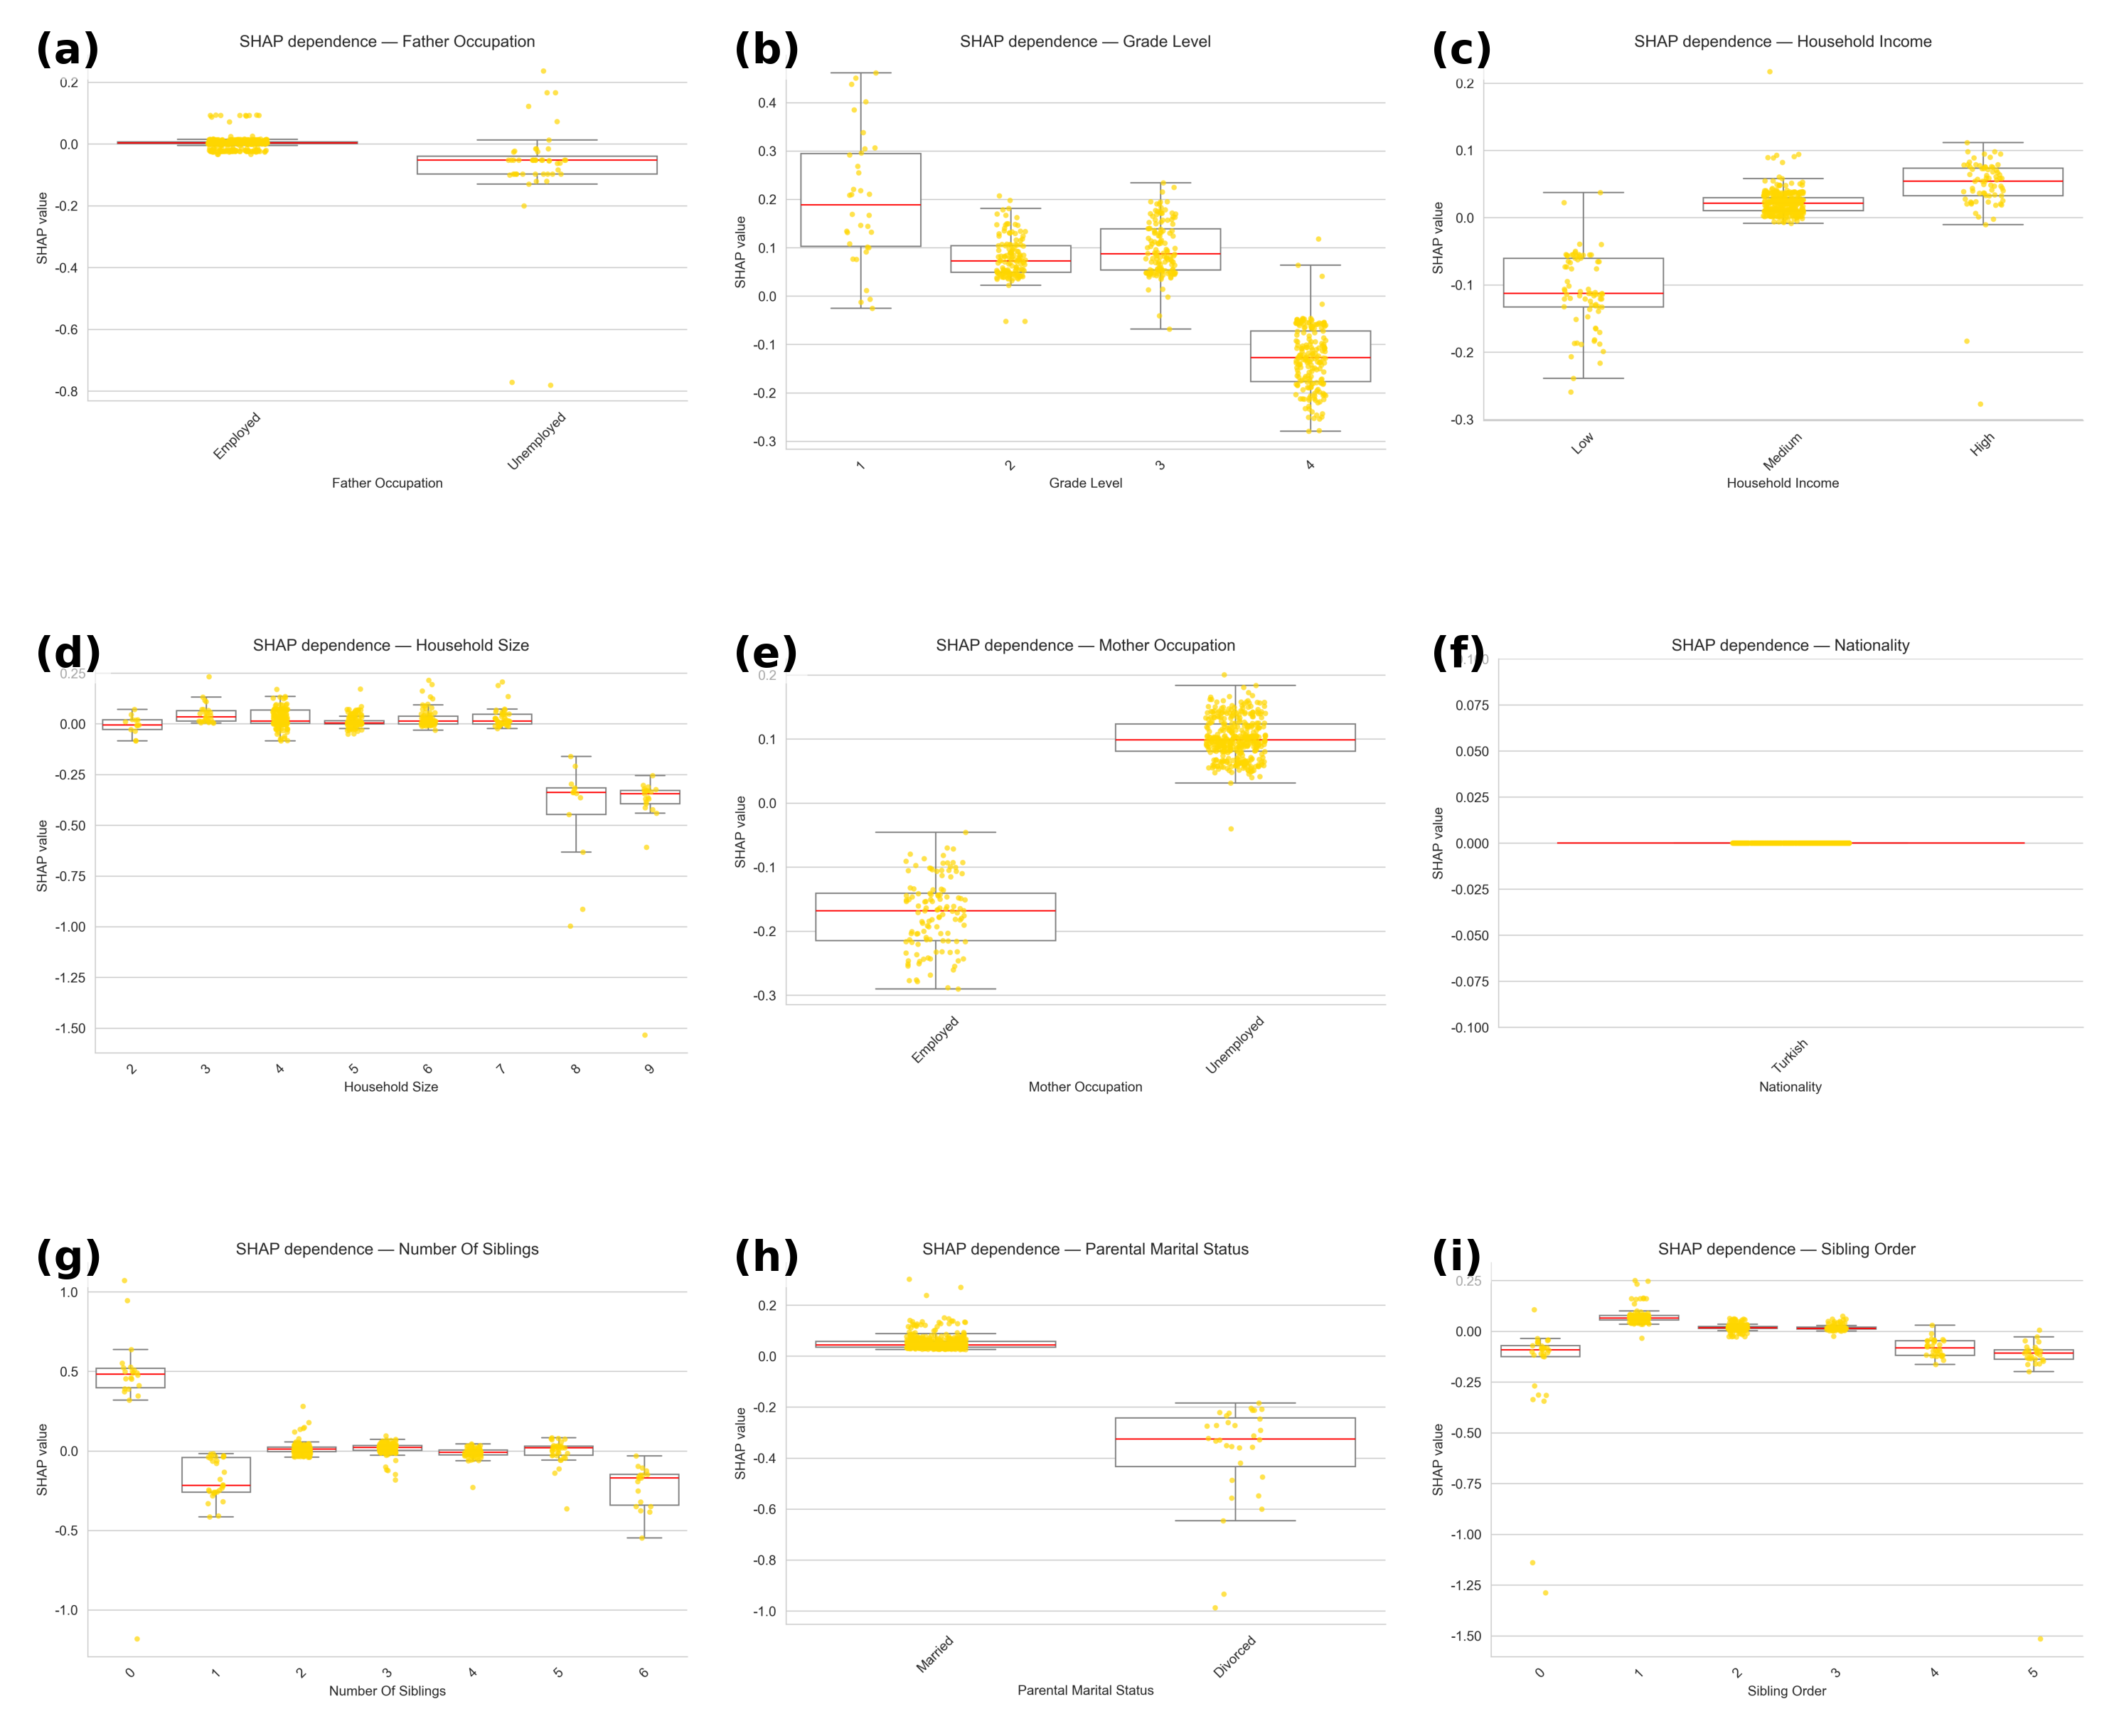
*

***Supplementary Figure S6. SHAP dependence plots for low-importance socio-demographic predictors in the Gradient Boosting Regressor model.***

*This figure illustrates SHAP dependence relationships for nine low-importance features—****(a)*** *Father Occupation,* ***(b)*** *Grade Level,* ***(c)*** *Household Income,* ***(d)*** *Household Size,* ***(e)*** *Mother Occupation,* ***(f)*** *Nationality,* ***(g)*** *Number of Siblings,* ***(h)*** *Parental Marital Status, and* ***(i)*** *Sibling Order. Each subplot depicts the marginal effect of a single predictor on the model output (SHAP value), with other variables held constant. Yellow points denote individual observations; boxplots summarize the dispersion, and red horizontal lines indicate medians.*

*Across all panels, SHAP distributions remain tightly clustered around zero (typical median range ≈ −0.1 to +0.1), confirming that these attributes exert* ***minimal influence*** *on predicted student happiness.*

***(a)*** *Father Occupation and* ***(e)*** *Mother Occupation show nearly flat, symmetric distributions, implying that parental employment status has negligible explanatory power once behavioral and psychosocial variables are included.*

***(b)*** *Grade Level and* ***(g)*** *Number of Siblings display small, non-monotonic variations without directional consistency, suggesting random variance rather than systematic effects.*

***(c)*** *Household Income and* ***(d)*** *Household Size yield weak and inconsistent trends (mean |SHAP| < 0.15), aligning with prior findings that economic proxies contribute marginally when psychosocial indicators dominate the variance structure.*

***(f)*** *Nationality remains effectively constant (SHAP ≈ 0 for all cases), reflecting sample homogeneity.*

***(h)*** *Parental Marital Status and* ***(i)*** *Sibling Order show only sporadic deviations from baseline, reinforcing their non-predictive character.*

*Collectively, these variables exhibit* ***mean |SHAP| values below 0.25****, validating their classification as tertiary or noise-level predictors. While included here for completeness, their limited explanatory contribution underscores that the model’s predictive structure is overwhelmingly driven by behavioral, communicative, and psychosocial dimensions rather than static household demographics.*


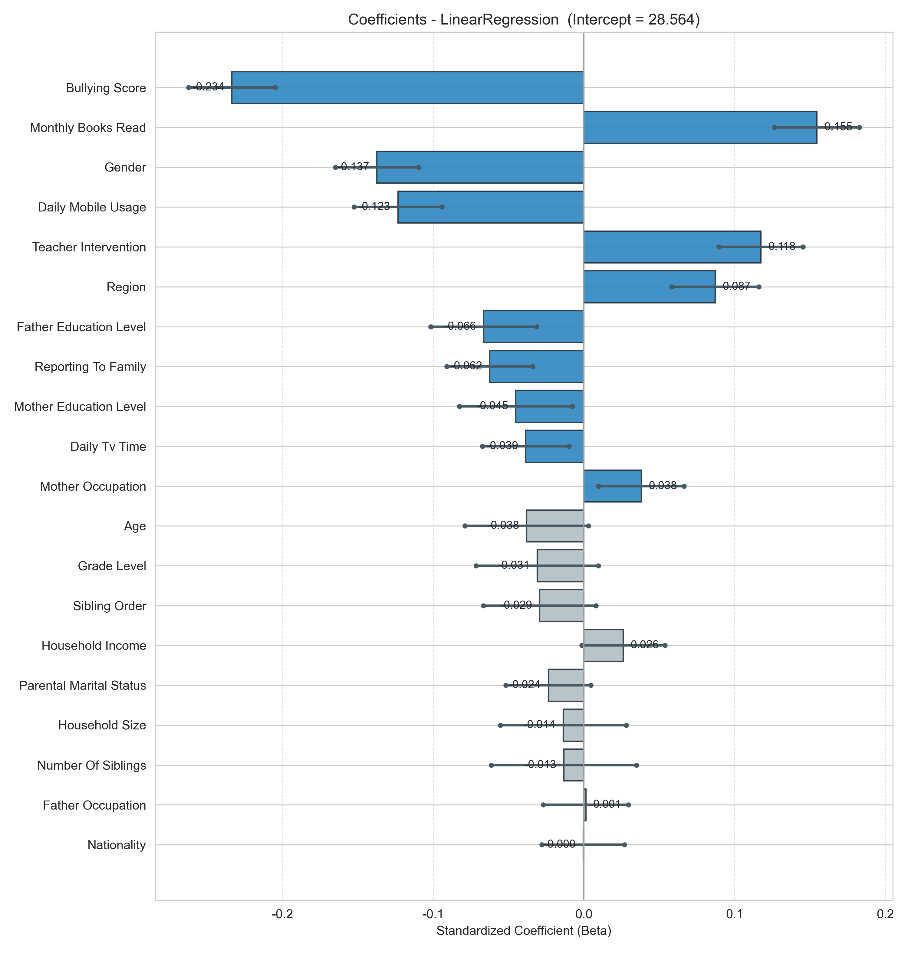


***Supplementary Figure S7. Standardized beta coefficients from the Ordinary Least Squares (OLS) regression model (N = 4,134).****Bars indicate standardized effect sizes (β), with error bars representing ± 1 standard error.
Negative coefficients (e.g., Bullying Score, Daily Mobile Usage, Daily TV Time) denote adverse associations with School Happiness, whereas positive coefficients (e.g., Monthly Books Read, Teacher Intervention, Region, Mother Occupation) reflect protective or supportive influences.
Among all predictors, Bullying Score (β = −0.23, p < 0.001) emerged as the strongest negative determinant, followed by mobile-phone and television use. Conversely, Monthly Books Read (β = 0.15, p < 0.001) and Teacher Intervention (β = 0.12, p < 0.001) were the most influential positive correlates of School Happiness.
Background and household variables (e.g., Age, Household Size, Nationality) exhibited coefficients near zero and were statistically non-significant (p > 0.05).
This figure complements Supplementary Table S13 by providing an effect-size hierarchy in standardized units, highlighting that behavioral and academic-engagement factors outweigh socio-economic background variables in predicting students’ School Happiness (F-statistic = 54.65, p < 0.001).*
